# Supplementary material for: Rotator Cuff Tenocytes Differentiate into Hypertrophic Chondrocyte-Like Cells to Produce Calcium Deposits in an Alkaline Phosphatase-Dependent Manner
Source: PubMed Central journal article supplement (PMC6833470; doi:10.3390/jcm8101544), 2019-09-26
Supplement: jcm-08-01544-s001.pdf [file jcm-08-01544-s001.pdf]

## **Supplementary material**

### **Supplemental methods**

#### *Characterization of tenocytes like cells*

Surface markers of TLC were determined at passage 2 by flow cytometry (FACS). The cells were incubated with antibodies against CD44, CD45, CD73, CD90, CD105, CD133 and CD146 for 20 minutes at room temperature. Unstained cells were used as controls (CT). After fixation, cells were analyzed with the BD-Accuri C6 Cytometer (BD Biosciences, Germany) and with BD-Accuri C6 Plus Software.

**Table S1.** Primers used for quantitative PCR.

| <b>GENE</b>                                                     | <b>Forward</b>           | <b>Reverse</b>           |
|-----------------------------------------------------------------|--------------------------|--------------------------|
| <i>RUNT-RELATED TRANSCRIPTION FACTOR 2 (RUNX2)</i>              | gcctaggcgcatttcaga       | gctcttctactgagagtggaagg  |
| SOX9                                                            | gtacccgcacttgcaaac       | tcgctctcgttcagaagtctc    |
| <i>TYPE I COLLAGEN (COL1A1)</i>                                 | ctggacctaaagggtgctgct    | gctccagcctctccatcttt     |
| <i>TYPE II COLLAGEN (COL2A1)</i>                                | tggtgctaattggcgagaag     | cccagtctctccacgttcac     |
| <i>TYPE III COLLAGEN (COL3A1)</i>                               | agggaaagatggccaag        | gcaccacctcacccttatc      |
| <i>TYPE X COLLAGEN (COL10A1)</i>                                | cacctctgcactgctcatc      | ggcagcatattctcagatgga    |
| <i>SECRETED PHOSPHOPROTEIN 1 (SPP1)</i>                         | gagggcttggtgtcagc        | caattctcatggtagtgagtttcc |
| <i>BONE GAMMA-CARBOXYGLUTAMATE PROTEIN (BGLAP)</i>              | ggcgctacctgtatcaatgg     | tcagccaactcgtcacagtc     |
| <i>BONE SIALOPROTEIN (BSP)</i>                                  | cgaatacacggcgctcaatg     | gtagctgtactcatctcataggc  |
| <i>TISSUE NON-SPECIFIC ALKALINE PHOSPHATASE (TNAP)</i>          | aacaccaccagggaac         | ggtcacaatgccacagatt      |
| <i>ECTONUCLEOTIDE PYROPHOSPHATE/PHOSPHODIESTERASE 1 (ENPP1)</i> | gaaagaccacactttacactctg  | ggctttgatgacttctactgct   |
| <i>MOHAWK HOMEBOX (MKX)</i>                                     | gctcgcagatgacgctagt      | tctggctgtcgaacggtatt     |
| <i>SCLERAXIS (SCX)</i>                                          | acctctgcctcagcaacca      | ggccacctcctaactgcaaat    |
| <i>TENOMODULIN (TNMD)</i>                                       | gccagacaagcaagtgagga     | ttgcctcgacggcagtaaat     |
| <i>CARTILAGE OLIGOMERIC MATRIX PROTEIN (COMP)</i>               | gacatcaggactctcgggacaac  | tcgtcgtcgaggcatcac       |
| <i>AGGRECAN (ACAN)</i>                                          | cccctgctatttcacgacctc    | gacacacggctccactgat      |
| <i>MATRIX METALLOPEPTIDASE 13 (MMP13)</i>                       | cctggacaagtagttccaagg    | gccgggttaggtgtagatagga   |
| <i>GLYCERALDEHYDE-3-PHOSPHATE dehydrogenase (GAPDH)</i>         | tgggtgtgaacctagagaagtatg | gggtcaggaggcattgct       |

**Supplemental figure S1. Histology and immunohistochemistry of a normal tendon** (representative images). HE: haematoxylin and eosin; SO/FG: Safranin O Fast Green; COL2: type II collagen; ENPP1: Ectonucleotidepyrophosphatase/phosphodiesterase 1; TNAP: Tissue non-specific alkaline phosphatase; COL10: type X collagen. Scale bar = 200 $\mu$ M.

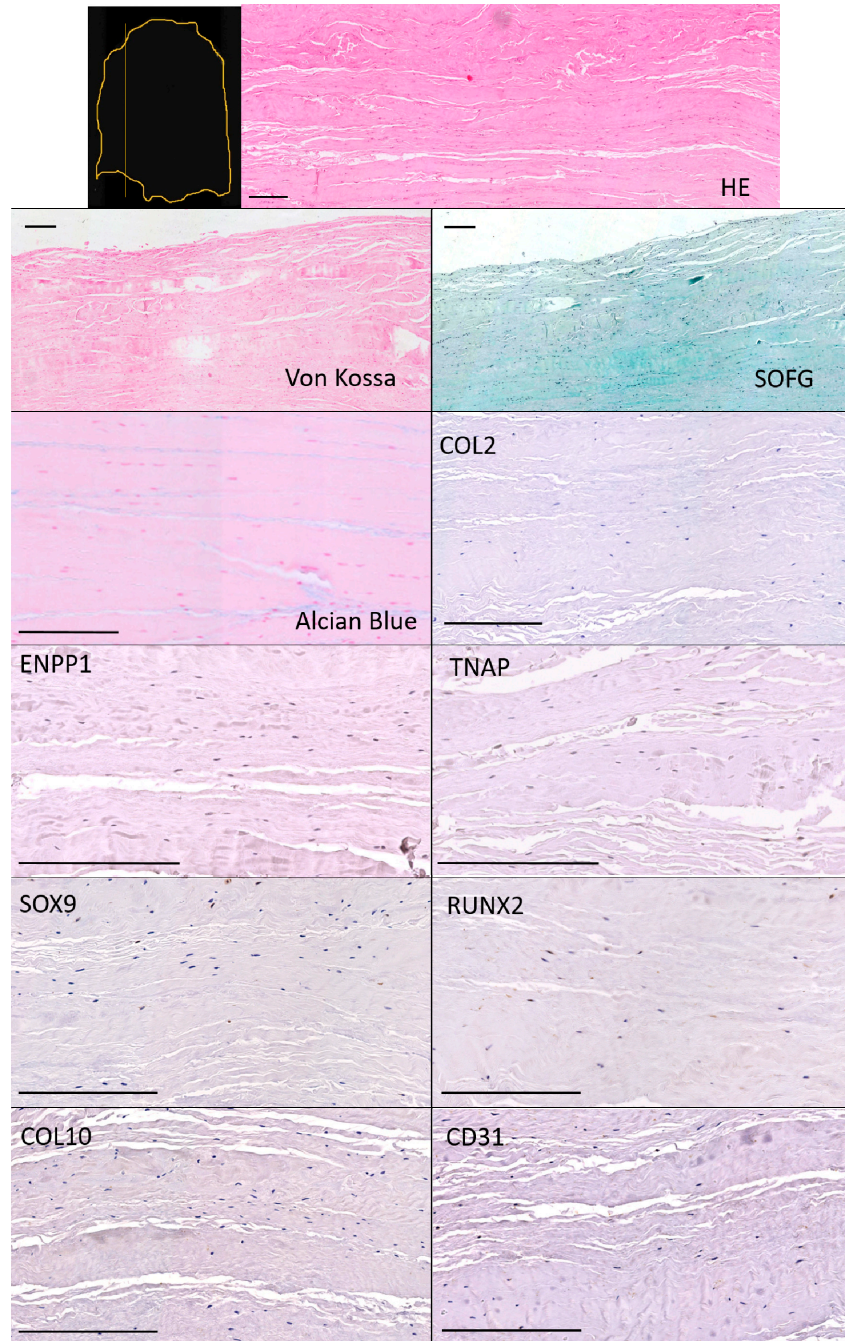

**Supplemental figure S2. Characterization of tenocyte-like cells.** A: Gene expression of tenocyte markers at different passages assessed by quantitative PCR (N=1). B: Surface markers of tenocyte-like cells assessed by Flow Cytometry (N=1). COL: collagen; MKX: Mohawk homeobox; SCX: scleraxis; TNMD: Tenomodulin; P: passage; ND: not detected; CT: control with unstained cells.

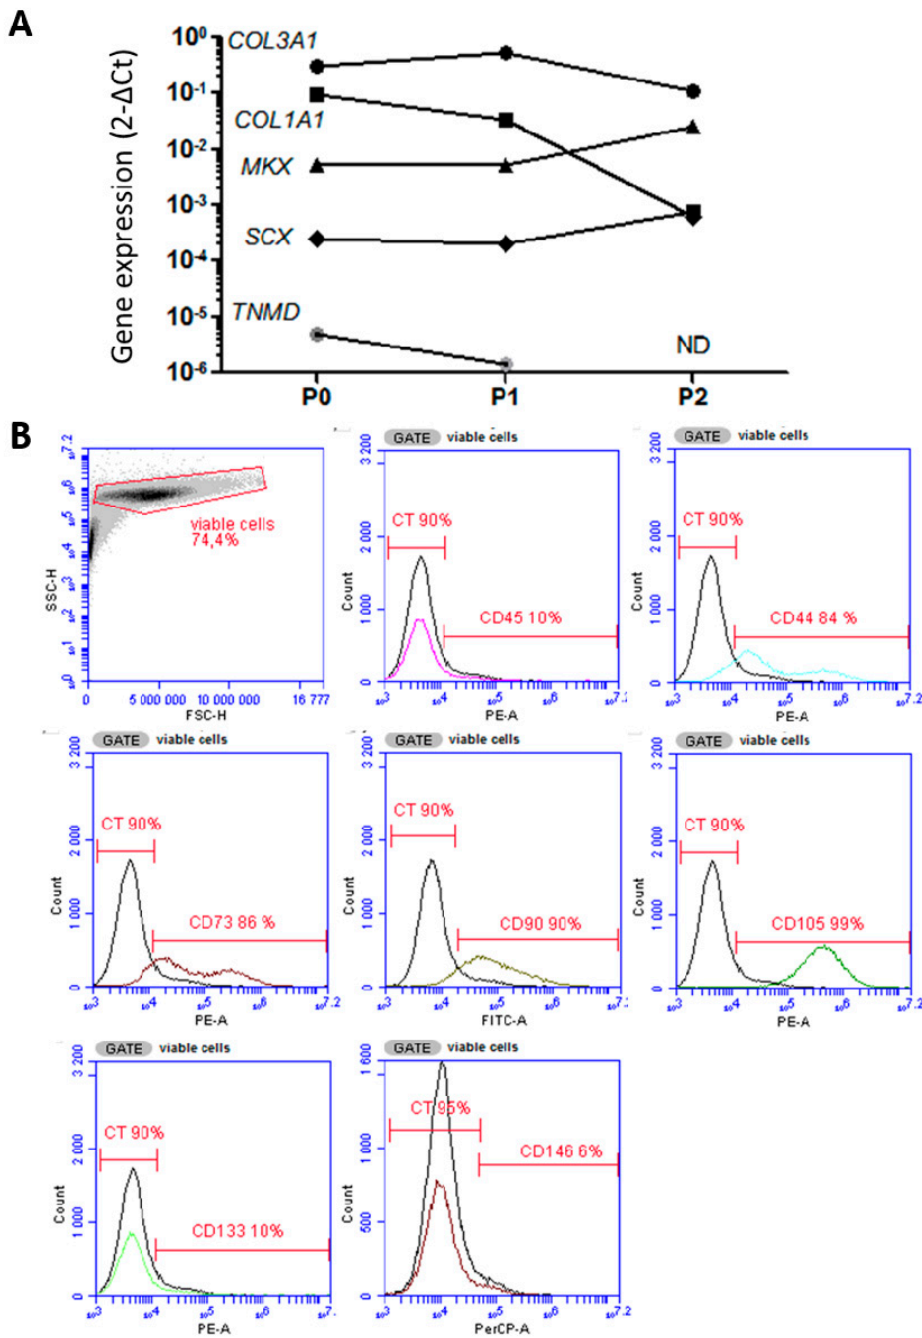

**Supplementary Table S2.** Proteomic analysis of calcium deposits from 5 patients.

P: peptides; SC: Spectral Count; BSC : Basic Spectral Count; SSC: Specific Spectral Count.

| Accession  | Description                                          | Gene name | Patient 1 |         |         | Patient 2 |         |         | Patient 3 |         |         | Patient 4 |         |         | Patient 5 |         |         | Total SSC |
|------------|------------------------------------------------------|-----------|-----------|---------|---------|-----------|---------|---------|-----------|---------|---------|-----------|---------|---------|-----------|---------|---------|-----------|
|            |                                                      |           | P         | BS C    | SS C    | P         | BS C    | SS C    | P         | BS C    | SS C    | P         | BS C    | SS C    | P         | BS C    | SS C    |           |
| AOA024R462 | Fibronectin 1, isoform CRA_n                         | FN1       | 7<br>2    | 13<br>6 | 13<br>6 | 6<br>3    | 11<br>0 | 11<br>0 | 7<br>4    | 13<br>2 | 13<br>2 | 8<br>7    | 22<br>1 | 22<br>1 | 7<br>5    | 16<br>9 | 16<br>9 | 768       |
| CO3        | Complement C3                                        | C3        | 7<br>6    | 13<br>8 | 13<br>8 | 4<br>2    | 73<br>0 | 73<br>0 | 5<br>2    | 80<br>0 | 80<br>0 | 8<br>6    | 18<br>3 | 18<br>3 | 4<br>9    | 80<br>0 | 80<br>0 | 554       |
| APOA1      | Apolipoprotein A-I                                   | APOA1     | 2<br>5    | 84<br>0 | 78<br>0 | 2<br>8    | 11<br>0 | 10<br>1 | 2<br>9    | 10<br>7 | 10<br>0 | 2<br>8    | 88<br>0 | 82<br>0 | 3<br>1    | 13<br>6 | 12<br>5 | 486       |
| ANT3       | Antithrombin-III                                     | SERPINC1  | 2<br>7    | 60<br>0 | 60<br>0 | 2<br>1    | 38<br>0 | 38<br>0 | 2<br>6    | 53<br>0 | 53<br>0 | 2<br>6    | 68<br>0 | 68<br>0 | 2<br>4    | 49<br>0 | 49<br>0 | 268       |
| PLMN       | Plasminogen                                          | PLG       | 3<br>2    | 40<br>0 | 40<br>0 | 2<br>4    | 29<br>0 | 29<br>0 | 2<br>9    | 38<br>0 | 38<br>0 | 3<br>9    | 64<br>0 | 64<br>0 | 3<br>8    | 63<br>0 | 63<br>0 | 234       |
| CO6A3      | Collagen alpha-3(VI) chain                           | COL6A3    | 3<br>0    | 36<br>0 | 36<br>0 | 1<br>9    | 22<br>0 | 22<br>0 | 2<br>7    | 39<br>0 | 39<br>0 | 5<br>0    | 64<br>0 | 64<br>0 | 3<br>2    | 39<br>0 | 39<br>0 | 200       |
| APOA4      | Apolipoprotein A-IV                                  | APOA4     | 1<br>5    | 24<br>0 | 24<br>0 | 2<br>4    | 46<br>0 | 46<br>0 | 2<br>2    | 29<br>0 | 29<br>0 | 2<br>1    | 25<br>0 | 25<br>0 | 2<br>0    | 33<br>0 | 33<br>0 | 157       |
| CLUS       | Clusterin                                            | CLU       | 1<br>2    | 21<br>0 | 21<br>0 | 1<br>2    | 27<br>0 | 27<br>0 | 1<br>3    | 28<br>0 | 28<br>0 | 2<br>1    | 42<br>0 | 42<br>0 | 1<br>9    | 36<br>0 | 36<br>0 | 154       |
| GELS       | Gelsolin                                             | GSN       | 2<br>0    | 38<br>0 | 38<br>0 | 1<br>5    | 26<br>0 | 26<br>0 | 2<br>0    | 29<br>0 | 29<br>0 | 1<br>3    | 18<br>0 | 18<br>0 | 2<br>4    | 39<br>0 | 39<br>0 | 150       |
| COMP       | Cartilage oligomeric matrix protein                  | COMP      | 2<br>2    | 35<br>0 | 33<br>0 | 1<br>1    | 19<br>0 | 16<br>0 | 1<br>4    | 19<br>0 | 16<br>0 | 3<br>0    | 60<br>0 | 57<br>0 | 2<br>0    | 27<br>0 | 25<br>0 | 147       |
| PRG4       | Proteoglycan 4                                       | PRG4      | 1<br>4    | 30<br>0 | 30<br>0 | 1<br>0    | 13<br>0 | 12<br>0 | 1<br>1    | 13<br>0 | 12<br>0 | 2<br>6    | 75<br>0 | 71<br>0 | 1<br>2    | 21<br>0 | 21<br>0 | 146       |
| PEDF       | Pigment epithelium-derived factor                    | SERPINF1  | 1<br>3    | 36<br>0 | 36<br>0 | 8<br>0    | 16<br>0 | 16<br>0 | 1<br>3    | 38<br>0 | 38<br>0 | 8<br>0    | 23<br>0 | 23<br>0 | 1<br>1    | 30<br>0 | 30<br>0 | 143       |
| ALBU       | Serum albumin                                        | ALB       | 6<br>9    | 77<br>5 | 40<br>0 | 6<br>0    | 67<br>2 | 15<br>0 | 6<br>6    | 82<br>3 | 40<br>0 | 5<br>6    | 39<br>5 | 8<br>0  | 6<br>6    | 65<br>9 | 27<br>0 | 130       |
| APOB       | Apolipoprotein B-100                                 | APOB      | 1<br>4    | 14<br>0 | 14<br>0 | 1<br>9    | 26<br>0 | 26<br>0 | 5<br>0    | 5<br>0  | 5<br>0  | 6<br>2    | 73<br>0 | 73<br>0 | 3<br>0    | 3<br>0  | 3<br>0  | 121       |
| AOA024R884 | Tenascin C (Hexabrachion), isoform CRA_a             | TNC       | 1<br>7    | 20<br>0 | 20<br>0 | 8<br>0    | 10<br>0 | 10<br>0 | 1<br>3    | 14<br>0 | 14<br>0 | 3<br>9    | 47<br>0 | 47<br>0 | 2<br>1    | 25<br>0 | 25<br>0 | 116       |
| AACT       | Alpha-1-antichymotrypsin                             | SERPINA3  | 1<br>3    | 23<br>0 | 23<br>0 | 1<br>3    | 22<br>0 | 22<br>0 | 1<br>5    | 27<br>0 | 27<br>0 | 1<br>1    | 17<br>0 | 17<br>0 | 1<br>2    | 22<br>0 | 22<br>0 | 111       |
| PCOC1      | Procollagen C-endopeptidase enhancer 1               | PCOLCE    | 1<br>2    | 20<br>0 | 20<br>0 | 1<br>2    | 18<br>0 | 18<br>0 | 1<br>4    | 21<br>0 | 21<br>0 | 1<br>3    | 25<br>0 | 25<br>0 | 1<br>3    | 25<br>0 | 25<br>0 | 109       |
| B4DPP8     | cDNA FLJ53075, highly similar to Kininogen-1         |           | 1<br>2    | 15<br>0 | 15<br>0 | 9<br>0    | 13<br>0 | 13<br>0 | 1<br>3    | 21<br>0 | 21<br>0 | 1<br>9    | 29<br>0 | 29<br>0 | 1<br>6    | 27<br>0 | 27<br>0 | 105       |
| AOA384MDQ7 | Epididymis secretory sperm binding protein           |           | 3<br>2    | 87<br>0 | 22<br>0 | 3<br>7    | 11<br>1 | 28<br>0 | 3<br>2    | 10<br>7 | 14<br>0 | 2<br>4    | 59<br>0 | 11<br>0 | 3<br>3    | 97<br>0 | 16<br>0 | 91        |
| B4E1Z4     | cDNA FLJ55673, highly similar to Complement factor B |           | 1<br>5    | 19<br>0 | 19<br>0 | 1<br>2    | 13<br>0 | 13<br>0 | 1<br>4    | 16<br>0 | 16<br>0 | 1<br>5    | 19<br>0 | 19<br>0 | 1<br>3    | 18<br>0 | 18<br>0 | 85        |
| CERU       | Ceruloplasmin                                        | CP        | 2<br>1    | 29<br>0 | 29<br>0 | 5<br>0    | 6<br>0  | 6<br>0  | 1<br>0    | 11<br>0 | 11<br>0 | 1<br>9    | 24<br>0 | 24<br>0 | 8<br>0    | 12<br>0 | 12<br>0 | 82        |
| FGFP2      | Fibroblast growth factor-binding protein 2           | FGFBP2    | 1<br>1    | 16<br>0 | 16<br>0 | 9<br>0    | 16<br>0 | 16<br>0 | 9<br>0    | 16<br>0 | 16<br>0 | 1<br>1    | 17<br>0 | 17<br>0 | 1<br>2    | 16<br>0 | 16<br>0 | 81        |
| VTNC       | Vitronectin                                          | VTN       | 5<br>0    | 10<br>0 | 10<br>0 | 7<br>0    | 9<br>0  | 9<br>0  | 5<br>0    | 8<br>0  | 8<br>0  | 1<br>4    | 41<br>0 | 41<br>0 | 6<br>0    | 11<br>0 | 11<br>0 | 79        |
| CILP1      | Cartilage intermediate layer protein 1               | CILP      | 1<br>0    | 11<br>0 | 11<br>0 | 1<br>0    | 12<br>0 | 12<br>0 | 8<br>0    | 10<br>0 | 10<br>0 | 2<br>4    | 29<br>0 | 29<br>0 | 1<br>5    | 16<br>0 | 16<br>0 | 78        |
| CO9        | Complement component C9                              | C9        | 1<br>0    | 13<br>0 | 13<br>0 | 5<br>0    | 5<br>0  | 5<br>0  | 8<br>0    | 10<br>0 | 10<br>0 | 1<br>9    | 38<br>0 | 38<br>0 | 7<br>0    | 11<br>0 | 11<br>0 | 77        |
| VTDB       | Vitamin D-binding protein                            | GC        | 9<br>0    | 13<br>0 | 13<br>0 | 9<br>0    | 13<br>0 | 13<br>0 | 9<br>0    | 16<br>0 | 16<br>0 | 1<br>3    | 17<br>0 | 17<br>0 | 1<br>4    | 18<br>0 | 18<br>0 | 77        |
| APOE       | Apolipoprotein E                                     | APOE      | 6<br>0    | 7<br>0  | 7<br>0  | 1<br>0    | 11<br>0 | 11<br>0 | 8<br>0    | 9<br>0  | 9<br>0  | 1<br>8    | 32<br>0 | 32<br>0 | 1<br>4    | 17<br>0 | 17<br>0 | 76        |
| FIBB       | Fibrinogen beta chain                                | FGB       | 1<br>1    | 13<br>0 | 13<br>0 | 8<br>0    | 11<br>0 | 11<br>0 | 1<br>1    | 13<br>0 | 13<br>0 | 2<br>8    | 35<br>0 | 35<br>0 | 3<br>0    | 3<br>0  | 3<br>0  | 75        |
| THRB       | Prothrombin                                          | F2        | 1<br>2    | 15<br>0 | 15<br>0 | 3<br>0    | 5<br>0  | 5<br>0  | 5<br>0    | 8<br>0  | 8<br>0  | 2<br>1    | 37<br>0 | 37<br>0 | 6<br>0    | 9<br>0  | 9<br>0  | 74        |
| F5GY80     | Complement component C8 beta chain                   | C8B       | 1<br>1    | 17<br>0 | 17<br>0 | 6<br>0    | 10<br>0 | 10<br>0 | 6<br>0    | 8<br>0  | 8<br>0  | 1<br>6    | 19<br>0 | 19<br>0 | 1<br>1    | 12<br>0 | 12<br>0 | 66        |
| FETUA      | Alpha-2-HS-glycoprotein                              | AHSG      | 7<br>0    | 14<br>0 | 14<br>0 | 6<br>0    | 9<br>0  | 9<br>0  | 5<br>0    | 7<br>0  | 7<br>0  | 1<br>0    | 24<br>0 | 24<br>0 | 8<br>0    | 12<br>0 | 12<br>0 | 66        |
| TENX       | Tenascin-X                                           | TNXB      | 8<br>4    | 8<br>15 | 8<br>15 | 1<br>4    | 15<br>0 | 15<br>0 | 1<br>2    | 13<br>0 | 13<br>0 | 1<br>4    | 14<br>0 | 14<br>0 | 1<br>2    | 12<br>0 | 12<br>0 | 62        |
| AOA024R617 | Alpha-1-antitrypsin                                  | SERPINA1  | 2<br>9    | 69<br>0 | 4<br>0  | 3<br>3    | 87<br>0 | 4<br>0  | 3<br>1    | 11<br>2 | 19<br>0 | 2<br>5    | 59<br>0 | 11<br>0 | 3<br>5    | 10<br>1 | 20<br>0 | 58        |
| CRAC1      | Cartilage acidic protein 1                           | CRTAC1    | 1<br>0    | 12<br>0 | 12<br>0 | 7<br>0    | 7<br>0  | 7<br>0  | 5<br>0    | 5<br>0  | 5<br>0  | 1<br>0    | 21<br>0 | 21<br>0 | 8<br>0    | 10<br>0 | 10<br>0 | 55        |

|        |                                                                        |                |                     |                    |                     |                     |                     |   |    |
|--------|------------------------------------------------------------------------|----------------|---------------------|--------------------|---------------------|---------------------|---------------------|---|----|
|        |                                                                        |                | 0                   |                    |                     | 4                   |                     |   |    |
| Q6PIL8 | IGK@ protein                                                           | IGK@           | 5 19 11             | 6 24 13            | 6 23 11             | 6 22 12             | 5 17 7              | 7 | 54 |
| ALS    | Insulin-like growth factor-binding protein complex acid labile subunit | IGFALS         | 9 12 12             | 5 5 5              | 7 7 7               | $\frac{1}{2}$ 17 17 | 7 12 12             |   | 53 |
| LBP    | Lipopolysaccharide-binding protein                                     | LBP            | 9 12 12             | 2 3 3              | 5 6 6               | 8 17 17             | 7 13 13             |   | 51 |
| HTRA1  | Serine protease HTRA1                                                  | HTRA1          | $\frac{1}{2}$ 14 14 | 4 6 6              | 6 8 8               | $\frac{1}{0}$ 16 16 | 4 5 5               |   | 49 |
| ANGT   | Angiotensinogen                                                        | AGT            | 7 8 8               | 7 11 11            | 6 7 7               | 7 11 11             | 8 11 11             |   | 48 |
| B4E1B2 | cDNA FLJ53691, highly similar to Serotransferrin                       |                | 4 5 5               | 8 8 8              | $\frac{1}{0}$ 12 12 | $\frac{1}{0}$ 13 13 | 9 10 10             |   | 48 |
| TTHY   | Transthyretin                                                          | TTR            | 8 12 12             | 4 5 5              | 8 14 14             | 9 9 9               | 8 8 8               |   | 48 |
| CO8A   | Complement component C8 alpha chain                                    | C8A            | 8 10 10             | 4 5 5              | 5 5 5               | $\frac{1}{6}$ 18 18 | 8 9 9               |   | 47 |
| CO8G   | Complement component C8 gamma chain                                    | C8G            | 4 10 10             | 2 5 5              | 3 6 6               | 8 15 15             | 6 11 11             |   | 47 |
| FIBG   | Fibrinogen gamma chain                                                 | FGG            | 8 8 8               | 5 6 6              | 7 7 7               | $\frac{1}{7}$ 20 20 | 3 3 3               |   | 44 |
| CO1A2  | Collagen alpha-2(I) chain                                              | COL1A2         | 9 10 10             | 5 5 5              | 9 9 9               | 7 7 7               | 9 11 11             |   | 42 |
| FIBA   | Fibrinogen alpha chain                                                 | FGA            | 4 4 4               | 3 4 4              | 6 8 8               | $\frac{1}{6}$ 21 21 | 5 5 5               |   | 42 |
| IPSP   | Plasma serine protease inhibitor                                       | SERPINA5       | 7 8 8               | 8 11 11            | 7 9 9               | 6 7 7               | 7 7 7               |   | 42 |
| KAIN   | Kallistatin                                                            | SERPINA4       | 8 11 11             | 5 6 6              | 6 7 7               | 7 9 9               | 7 9 9               |   | 42 |
| SPRC   | SPARC                                                                  | SPARC          | 7 10 10             | 6 7 7              | 7 8 8               | 1 1 1               | $\frac{1}{0}$ 14 14 |   | 40 |
| CO5    | Complement C5                                                          | C5             | 5 5 5               | 6 7 7              | 1 1 1               | $\frac{1}{9}$ 22 22 | 4 4 4               |   | 39 |
| ITIH4  | Inter-alpha-trypsin inhibitor heavy chain H4                           | ITIH4          | 4 4 4               | 5 7 7              | 2 2 2               | $\frac{1}{4}$ 18 18 | 6 6 6               |   | 37 |
| CO3A1  | Collagen alpha-1(III) chain                                            | COL3A1         | 4 4 4               | 5 6 6              | 6 9 9               | 5 6 6               | $\frac{1}{0}$ 11 11 |   | 36 |
| HEP2   | Heparin cofactor 2                                                     | SERPIND1       | 7 7 7               | 3 4 4              | 4 6 6               | $\frac{1}{1}$ 13 13 | 5 6 6               |   | 36 |
| INHBA  | Inhibin beta A chain                                                   | INHBA          | 3 3 3               | 3 4 4              | 6 6 6               | 8 9 9               | $\frac{1}{1}$ 14 14 |   | 36 |
| Q6N093 | Uncharacterized protein DKFZp686104196 (Fragment)                      | DKFZp686104196 | $\frac{1}{0}$ 18 10 | 7 10 2             | $\frac{1}{3}$ 25 9  | $\frac{1}{2}$ 25 10 | $\frac{1}{0}$ 18 5  |   | 36 |
| APOA2  | Apolipoprotein A-II                                                    | APOA2          | 3 7 7               | 5 7 7              | 5 7 7               | 4 8 8               | 3 6 6               |   | 35 |
| Q6MZQ6 | Uncharacterized protein DKFZp686G11190                                 | DKFZp686G11190 | $\frac{1}{2}$ 25 5  | $\frac{1}{1}$ 22 7 | $\frac{1}{3}$ 31 7  | $\frac{1}{2}$ 32 8  | $\frac{1}{3}$ 31 7  |   | 34 |
| APOC1  | Apolipoprotein C-I                                                     | APOC1          | 3 3 3               | 4 9 9              | 4 6 6               | 5 8 8               | 3 6 6               |   | 32 |
| BGH3   | Transforming growth factor-beta-induced protein ig-h3                  | TGFBI          | 7 8 8               | 4 4 4              | 3 3 3               | 8 10 10             | 7 7 7               |   | 32 |
| CCD80  | Coiled-coil domain-containing protein 80                               | CCDC80         | 5 6 6               | 1 1 1              | 2 2 2               | $\frac{1}{0}$ 16 16 | 4 6 6               |   | 31 |
| CD14   | Monocyte differentiation antigen CD14                                  | CD14           | 5 9 9               | 2 2 2              | 4 5 5               | 4 6 6               | 7 9 9               |   | 31 |
| Q8NEJ1 | Uncharacterized protein                                                |                | 3 7 4               | 4 9 4              | 5 16 9              | 5 9 6               | 4 11 8              |   | 31 |
| CHAD   | Chondroadherin                                                         | CHAD           | 6 10 10             | 4 5 5              | 1 1 1               | 6 10 10             | 3 4 4               |   | 30 |
| HABP2  | Hyaluronan-binding protein 2                                           | HABP2          | 1 1 1               | 2 3 3              | 5 8 8               | 9 13 13             | 5 5 5               |   | 30 |
| TSP1   | Thrombospondin-1                                                       | THBS1          | 6 7 7               | 3 3 3              | 5 5 5               | 6 7 7               | 8 8 8               |   | 30 |
| PRELP  | Prolargin                                                              | PRELP          | 5 6 6               | 2 2 2              | 4 5 5               | 9 12 12             | 4 4 4               |   | 29 |
| APOL1  | Apolipoprotein L1                                                      | APOL1          | 2 2 2               | 3 4 4              | 4 4 4               | 8 10 10             | 7 8 8               |   | 28 |
| CO7    | Complement component C7                                                | C7             | 3 3 3               |                    | 3 3 3               | $\frac{1}{4}$ 18 18 | 4 4 4               |   | 28 |
| LUM    | Lumican                                                                | LUM            | 4 6 6               | 1 1 1              | 6 9 9               | 5 6 6               | 4 5 5               |   | 27 |
| SAMP   | Serum amyloid P-component                                              | APCS           | 5 6 6               | 3 4 4              | 4 5 5               | 6 8 8               | 4 4 4               |   | 27 |
| A2AP   | Alpha-2-antiplasmin                                                    | SERPINF2       | 7 7 7               | 3 3 3              | 5 5 5               | 4 5 5               | 6 6 6               |   | 26 |
| AMBP   | Protein AMBP                                                           | AMBP           | 4 5 5               | 1 1 1              | 4 5 5               | 5 8 8               | 5 7 7               |   | 26 |
| CO6A1  | Collagen alpha-1(VI) chain                                             | COL6A1         | 3 4 4               | 2 2 2              | 4 5 5               | 6 9 9               | 6 6 6               |   | 26 |
| ENOA   | Alpha-enolase                                                          | ENO1           | 5 6 6               | 3 3 3              | 4 4 4               | 9 10 10             | 2 3 3               |   | 26 |
| MXRA5  | Matrix-remodeling-associated protein 5                                 | MXRA5          | 2 2 2               |                    |                     | $\frac{1}{7}$ 22 22 | 2 2 2               |   | 26 |
| SODE   | Extracellular superoxide dismutase [Cu-Zn]                             | SOD3           | 5 6 6               | 3 3 3              | 3 3 3               | 4 7 7               | 5 7 7               |   | 26 |
| PGS2   | Decorin                                                                | DCN            | 5 6 6               | 4 5 5              | 2 2 2               | 8 11 11             | 1 1 1               |   | 25 |
| PON1   | Serum paraoxonase/arylesterase 1                                       | PON1           | 1 1 1               | 1 4 4              | 2 3 3               | 5 12 12             | 2 5 5               |   | 25 |
| VIME   | Vimentin                                                               | VIM            |                     | 1 1 1              | 1 1 1               | $\frac{1}{2}$ 15 15 | 7 8 8               |   | 25 |

|            |                                                                                                              |           |   |    |    |   |    |   |    |    |    |   |    |    |    |    |    |    |    |    |    |
|------------|--------------------------------------------------------------------------------------------------------------|-----------|---|----|----|---|----|---|----|----|----|---|----|----|----|----|----|----|----|----|----|
| HBB        | Hemoglobin subunit beta                                                                                      | HBB       | 7 | 12 | 4  | 3 | 4  | 2 | 7  | 11 | 4  | 5 | 6  | 2  | 1  | 22 | 12 | 24 |    |    |    |
| G3P        | Glyceraldehyde-3-phosphate dehydrogenase                                                                     | GAPDH     | 3 | 4  | 4  | 3 | 3  | 3 |    |    |    | 8 | 9  | 9  | 5  | 7  | 7  | 23 |    |    |    |
| FBLN1      | Fibulin-1                                                                                                    | FBLN1     | 2 | 2  | 2  |   |    |   | 1  | 1  | 1  | 1 | 2  | 16 | 16 | 3  | 3  | 3  | 22 |    |    |
| ANXA1      | Annexin A1                                                                                                   | ANXA1     | 1 | 1  | 1  | 2 | 2  | 2 | 4  | 5  | 5  | 7 | 8  | 8  | 5  | 5  | 5  | 21 |    |    |    |
| H14        | Histone H1.4                                                                                                 | HIST1H1E  | 4 | 5  | 5  | 2 | 3  | 3 | 2  | 3  | 3  | 3 | 4  | 4  | 4  | 6  | 6  | 21 |    |    |    |
| HBA        | Hemoglobin subunit alpha                                                                                     | HBA1      | 4 | 6  | 6  | 2 | 3  | 3 | 2  | 2  | 2  | 3 | 3  | 3  | 6  | 7  | 7  | 21 |    |    |    |
| HPT        | Haptoglobin                                                                                                  | HP        | 5 | 6  | 4  | 3 | 4  | 3 | 9  | 11 | 7  | 5 | 7  | 6  | 2  | 3  | 1  | 21 |    |    |    |
| IBP5       | Insulin-like growth factor-binding protein 5                                                                 | IGFBP5    | 3 | 3  | 3  | 1 | 3  | 3 | 3  | 4  | 4  | 6 | 7  | 7  | 4  | 4  | 4  | 21 |    |    |    |
| LDHA       | L-lactate dehydrogenase A chain                                                                              | LDHA      | 3 | 3  | 3  | 1 | 1  | 1 | 1  | 1  | 1  | 1 | 0  | 14 | 14 | 2  | 2  | 2  | 21 |    |    |
| PGRP2      | N-acetylmuramoyl-L-alanine amidase                                                                           | PGLYRP2   | 2 | 2  | 2  |   |    |   |    |    |    | 8 | 13 | 13 | 5  | 6  | 6  | 21 |    |    |    |
| TARSH      | Target of Nesh-SH3                                                                                           | ABI3BP    | 2 | 3  | 3  | 1 | 1  | 1 | 2  | 2  | 2  | 9 | 13 | 13 | 1  | 2  | 2  | 21 |    |    |    |
| AEBP1      | Adipocyte enhancer-binding protein 1                                                                         | AEBP1     | 2 | 2  | 2  |   |    |   |    |    |    | 1 | 1  | 16 | 16 | 2  | 2  | 2  | 20 |    |    |
| FHR1       | Complement factor H-related protein 1                                                                        | CFHR1     | 6 | 6  | 2  | 5 | 7  | 1 | 9  | 13 | 4  | 8 | 9  | 3  | 1  | 0  | 19 | 9  | 19 |    |    |
| AOA024R498 | Serpin peptidase inhibitor, clade E (Nexin, plasminogen activator inhibitor type 1), member 2, isoform CRA_b | SERPINE2  | 2 | 2  | 2  |   |    |   |    |    |    | 1 | 1  | 13 | 13 | 3  | 3  | 3  | 18 |    |    |
| ANXA5      | Annexin A5                                                                                                   | ANXA5     | 4 | 4  | 4  | 1 | 1  | 1 | 4  | 4  | 4  | 7 | 7  | 7  | 2  | 2  | 2  | 18 |    |    |    |
| CBPB2      | Carboxypeptidase B2                                                                                          | CPB2      | 3 | 3  | 3  | 3 | 3  | 3 | 1  | 1  | 1  | 6 | 9  | 9  | 2  | 2  | 2  | 18 |    |    |    |
| MMP3       | Stromelysin-1                                                                                                | MMP3      | 1 | 1  | 1  | 1 | 1  | 1 | 4  | 4  | 4  | 7 | 8  | 8  | 4  | 4  | 4  | 18 |    |    |    |
| APOD       | Apolipoprotein D                                                                                             | APOD      | 1 | 1  | 1  | 3 | 4  | 4 | 2  | 2  | 2  | 6 | 6  | 6  | 4  | 4  | 4  | 17 |    |    |    |
| CO6A2      | Collagen alpha-2(VI) chain                                                                                   | COL6A2    | 2 | 2  | 2  | 1 | 1  | 1 | 3  | 3  | 3  | 7 | 9  | 9  | 2  | 2  | 2  | 17 |    |    |    |
| FHR2       | Complement factor H-related protein 2                                                                        | CFHR2     | 5 | 5  | 3  | 4 | 5  | 2 | 7  | 11 | 6  | 4 | 5  | 2  | 7  | 8  | 4  | 17 |    |    |    |
| PGK1       | Phosphoglycerate kinase 1                                                                                    | PGK1      | 4 | 5  | 5  |   |    |   |    |    |    | 9 | 11 | 11 | 1  | 1  | 1  | 17 |    |    |    |
| ANXA2      | Annexin A2                                                                                                   | ANXA2     | 3 | 3  | 3  | 1 | 2  | 2 |    |    |    | 6 | 7  | 7  | 4  | 4  | 4  | 16 |    |    |    |
| CH3L1      | Chitinase-3-like protein 1                                                                                   | CHI3L1    | 7 | 7  | 7  | 1 | 1  | 1 | 1  | 1  | 1  | 5 | 5  | 5  | 2  | 2  | 2  | 16 |    |    |    |
| IC1        | Plasma protease C1 inhibitor                                                                                 | SERPING1  |   |    |    | 3 | 5  | 5 | 2  | 2  | 2  | 7 | 7  | 7  | 2  | 2  | 2  | 16 |    |    |    |
| IGK        | Immunoglobulin kappa light chain                                                                             |           | 6 | 11 | 3  | 7 | 14 | 4 | 7  | 15 | 4  | 7 | 12 | 2  | 7  | 13 | 3  | 16 |    |    |    |
| ITIH2      | Inter-alpha-trypsin inhibitor heavy chain H2                                                                 | ITIH2     | 1 | 1  | 1  | 1 | 1  | 1 | 2  | 2  | 2  | 8 | 10 | 10 | 2  | 2  | 2  | 16 |    |    |    |
| MIME       | Mimecan                                                                                                      | OGN       | 4 | 6  | 6  | 2 | 2  | 2 | 2  | 3  | 3  | 2 | 3  | 3  | 2  | 2  | 2  | 16 |    |    |    |
| TR11B      | Tumor necrosis factor receptor superfamily member 11B                                                        | TNFRSF11B | 3 | 4  | 4  | 1 | 1  | 1 | 3  | 3  | 3  | 2 | 3  | 3  | 5  | 5  | 5  | 16 |    |    |    |
| AOA075B6Z2 | T cell receptor alpha joining 56 (Fragment)                                                                  | TRAJ56    | 1 | 4  | 4  | 1 | 5  | 5 | 1  | 3  | 3  | 1 | 2  | 2  | 1  | 1  | 1  | 15 |    |    |    |
| B2R5G8     | Serum amyloid A protein                                                                                      |           | 4 | 4  | 1  | 4 | 5  | 1 | 3  | 3  | 1  | 5 | 15 | 8  | 5  | 9  | 4  | 15 |    |    |    |
| TRFM       | Melanotransferrin                                                                                            | MELTF     |   |    |    | 2 | 2  | 2 | 1  | 1  | 1  | 3 | 3  | 3  | 9  | 9  | 9  | 15 |    |    |    |
| APOC3      | Apolipoprotein C-III                                                                                         | APOC3     | 1 | 1  | 1  | 2 | 5  | 5 | 2  | 3  | 3  | 2 | 2  | 2  | 2  | 3  | 3  | 14 |    |    |    |
| CILP2      | Cartilage intermediate layer protein 2                                                                       | CILP2     | 2 | 2  | 2  | 1 | 1  | 1 | 1  | 1  | 1  | 6 | 7  | 7  | 3  | 3  | 3  | 14 |    |    |    |
| IGHG3      | Immunoglobulin heavy constant gamma 3                                                                        | IGHG3     | 8 | 15 | 3  | 9 | 11 | 2 | 1  | 2  | 21 | 4 | 1  | 1  | 22 | 3  | 9  | 18 | 2  | 14 |    |
| LYSC       | Lysozyme C                                                                                                   | LYZ       | 2 | 2  | 2  |   |    |   | 3  | 3  | 3  | 3 | 4  | 4  | 5  | 5  | 5  | 14 |    |    |    |
| MMP2       | 72 kDa type IV collagenase                                                                                   | MMP2      | 1 | 1  | 1  |   |    |   |    |    |    | 8 | 11 | 11 | 2  | 2  | 2  | 14 |    |    |    |
| QSOX1      | Sulfhydryl oxidase 1                                                                                         | QSOX1     | 2 | 2  | 2  |   |    |   | 1  | 1  | 1  | 6 | 6  | 6  | 5  | 5  | 5  | 14 |    |    |    |
| AOA0X9UWL5 | GCT-A5 light chain variable region (Fragment)                                                                |           | 1 | 1  | 1  | 2 | 3  | 3 | 3  | 4  | 4  | 2 | 3  | 3  | 2  | 2  | 2  | 13 |    |    |    |
| FNDC1      | Fibronectin type III domain-containing protein 1                                                             | FNDC1     | 1 | 1  | 1  |   |    |   | 3  | 3  | 3  | 5 | 6  | 6  | 3  | 3  | 3  | 13 |    |    |    |
| KPYM       | Pyruvate kinase PKM                                                                                          | PKM       |   |    |    |   |    |   |    |    |    | 1 | 1  | 13 | 13 |    |    | 13 |    |    |    |
| AOA0G2JPRO | Complement C4-A                                                                                              | C4A       | 2 | 9  | 37 | 3 | 1  | 2 | 15 | 1  | 6  | 7 | 4  | 5  | 71 | 5  | 1  | 7  | 20 | 3  | 12 |
| AOA0X9USM3 | GCT-A4 heavy chain variable region (Fragment)                                                                |           | 2 | 3  | 3  | 3 | 4  | 3 | 2  | 3  | 2  | 3 | 3  | 1  | 4  | 5  | 3  | 12 |    |    |    |
| FMOD       | Fibromodulin                                                                                                 | FMOD      | 1 | 1  | 1  | 1 | 1  | 1 | 2  | 2  | 2  | 2 | 5  | 5  | 2  | 3  | 3  | 12 |    |    |    |
| RNAS4      | Ribonuclease 4                                                                                               | RNASE4    | 1 | 1  | 1  | 1 | 1  | 1 | 2  | 2  | 2  | 2 | 3  | 3  | 3  | 5  | 5  | 12 |    |    |    |
| APOH       | Beta-2-glycoprotein 1                                                                                        | APOH      |   |    |    | 1 | 1  | 1 | 1  | 1  | 1  | 3 | 5  | 5  | 4  | 4  | 4  | 11 |    |    |    |
| B1ALD9     | Periostin                                                                                                    | POSTN     | 8 | 8  |    |   |    |   |    |    |    | 2 | 6  | 37 | 7  | 1  | 3  | 17 | 4  | 11 |    |
| CO4B       | Complement C4-B                                                                                              | C4B       | 3 | 0  | 36 | 2 | 1  | 1 | 14 | 7  | 8  | 1 | 4  | 6  | 73 | 7  | 1  | 6  | 18 | 1  | 11 |
| GPX3       | Glutathione peroxidase 3                                                                                     | GPX3      | 1 | 1  | 1  |   |    |   |    |    |    | 6 | 8  | 8  | 2  | 2  | 2  | 11 |    |    |    |
| ITIH1      | Inter-alpha-trypsin inhibitor heavy chain H1                                                                 | ITIH1     | 1 | 1  | 1  | 1 | 1  | 1 | 1  | 1  | 1  | 5 | 5  | 5  | 3  | 3  | 3  | 11 |    |    |    |

|             |                                                                                                  |            |            |            |            |          |            |    |
|-------------|--------------------------------------------------------------------------------------------------|------------|------------|------------|------------|----------|------------|----|
| PGBM        | Basement membrane-specific heparan sulfate proteoglycan core protein                             | HSPG2      | 6 7 1      | 2 2 1      | 7 10 1     | 1 4 14 7 | 7 12 1     | 11 |
| THBG        | Thyroxine-binding globulin                                                                       | SERPIN A7  | 2 2 2      | 3 3 3      | 3 3 3      | 1 1 1    | 2 2 2      | 11 |
| A0N5G3      | Rheumatoid factor G9 light chain (Fragment)                                                      | V-lambda-3 |            | 1 1 1      | 3 5 5      | 1 1 1    | 2 3 3      | 10 |
| A2MG        | Alpha-2-macroglobulin                                                                            | A2M        | 3 3 3      |            |            | 7 7 7    |            | 10 |
| AT2A2       | Sarcoplasmic/endoplasmic reticulum calcium ATPase 2                                              | ATP2A2     |            |            | 2 2        |          | 1 3 16 10  | 10 |
| CCL18       | C-C motif chemokine 18                                                                           | CCL18      | 1 1 1      | 1 1 1      | 2 2 2      | 3 3 3    | 3 3 3      | 10 |
| CO5A1       | Collagen alpha-1(V) chain                                                                        | COL5A1     |            |            |            | 7 9 9    | 1 1 1      | 10 |
| CSPG2       | Versican core protein                                                                            | VCAN       | 1 1 1      | 2 2 2      | 1 1 1      | 5 6 6    |            | 10 |
| TIMP2       | Metalloproteinase inhibitor 2                                                                    | TIMP2      |            |            | 3 3 3      | 2 2 2    | 3 5 5      | 10 |
| ABCF1       | ATP-binding cassette sub-family F member 1                                                       | ABCF1      | 1 3 3      | 1 2 2      | 1 2 2      | 1 1 1    | 1 1 1      | 9  |
| ATPB        | ATP synthase subunit beta, mitochondrial                                                         | ATP5F1 B   |            |            |            | 2 2 2    | 7 7 7      | 9  |
| F6KPG5      | Albumin (Fragment)                                                                               |            | 6 73 8 7 2 | 5 66 9 0 3 | 6 78 5 6 3 | 5 38 3 7 | 6 63 3 3 1 | 9  |
| KLKB1       | Plasma kallikrein                                                                                | KLKB1      | 1 1 1      | 1 1 1      | 2 2 2      | 5 5 5    |            | 9  |
| LOR5A1      | Alternative protein CSF2RB                                                                       | CSF2RB     | 1 1 1      | 1 3 3      | 1 2 2      | 1 1 1    | 1 2 2      | 9  |
| PCOC2       | Procollagen C-endopeptidase enhancer 2                                                           | PCOLCE 2   | 2 2 2      | 1 1 1      | 1 1 1      | 5 5 5    |            | 9  |
| Q6NS95      | IGL@ protein                                                                                     | IGL@       | 3 4 1      | 3 6 1      | 5 11 4     | 3 4 1    | 4 5 2      | 9  |
| Q96K68      | cDNA FLJ14473 fis, clone MAMMA1001080, highly similar to Homo sapiens SNC73 protein (SNC73) mRNA |            | 3 6 2      | 3 4 2      | 4 6 2      | 6 6 2    | 4 4 1      | 9  |
| SAA4        | Serum amyloid A-4 protein                                                                        | SAA4       | 4 4 1      | 3 4        | 3 3 1      | 6 10 3   | 6 9 4      | 9  |
| AOA125Q YY9 | IBM-B2 heavy chain variable region (Fragment)                                                    |            | 1 1 1      | 1 1 1      | 2 4 4      | 1 1 1    | 1 1 1      | 8  |
| A2KBB9      | Anti-(ED-B) scFV (Fragment)                                                                      |            | 3 4 2      | 4 4 1      | 4 4 1      | 5 6 2    | 5 6 2      | 8  |
| ACTS        | Actin, alpha skeletal muscle                                                                     | ACTA1      | 2 2        | 4 4 1      | 4 4        | 6 11 2   | 1 13 5 0   | 8  |
| AMPN        | Aminopeptidase N                                                                                 | ANPEP      |            |            |            | 7 8 8    |            | 8  |
| AT2A1       | Sarcoplasmic/endoplasmic reticulum calcium ATPase 1                                              | ATP2A1     |            |            | 5 5 3      |          | 9 11 5     | 8  |
| B4DPR2      | cDNA FLJ50830, highly similar to Serum albumin                                                   |            | 5 62 3 6 7 | 4 55 2 2   | 4 66 8 0   | 3 31 8 5 | 4 52 7 3 1 | 8  |
| ENPP1       | Ectonucleotide pyrophosphatase/phosphodiesterase family member 1                                 | ENPP1      |            |            |            | 8 8 8    |            | 8  |
| HEMO        | Hemopexin                                                                                        | HPX        |            | 1 1 1      | 1 1 1      | 3 3 3    | 2 3 3      | 8  |
| PGS1        | Biglycan                                                                                         | BGN        | 1 1 1      |            |            | 6 6 6    | 1 1 1      | 8  |
| PLTP        | Phospholipid transfer protein                                                                    | PLTP       | 1 1 1      | 1 1 1      |            | 4 4 4    | 2 2 2      | 8  |
| ZPI         | Protein Z-dependent protease inhibitor                                                           | SERPIN A10 | 2 2 2      |            | 1 1 1      | 3 5 5    |            | 8  |
| 1433Z       | 14-3-3 protein zeta/delta                                                                        | YWHAZ      | 1 1        | 1 1 1      | 1 1 1      | 5 6 4    | 1 1 1      | 7  |
| AOA0X9T D47 | MS-D1 light chain variable region (Fragment)                                                     |            | 1 1 1      | 1 1 1      | 2 2 2      | 1 2 2    | 1 1 1      | 7  |
| C1S         | Complement C1s subcomponent                                                                      | C1S        |            |            |            | 5 5 5    | 1 2 2      | 7  |
| CO2A1       | Collagen alpha-1(II) chain                                                                       | COL2A1     |            | 1 1 1      | 1 1 1      | 1 1 1    | 4 4 4      | 7  |
| CO5A2       | Collagen alpha-2(V) chain                                                                        | COL5A2     |            |            |            | 5 6 6    | 1 1 1      | 7  |
| D3DXT7      | Collagen, type I, alpha 1, isoform CRA_a                                                         | COL1A1     | 3 5 5      |            | 1 1 1      |          | 1 1 1      | 7  |
| MOES        | Moesin                                                                                           | MSN        | 1 1 1      |            |            | 5 5 5    | 1 1 1      | 7  |
| NUCB1       | Nucleobindin-1                                                                                   | NUCB1      | 1 1 1      |            | 1 1 1      | 3 3 3    | 2 2 2      | 7  |
| SEPP1       | Selenoprotein P                                                                                  | SELENO P   |            |            | 3 3 3      | 2 2 2    | 2 2 2      | 7  |
| TETN        | Tetranectin                                                                                      | CLEC3B     | 1 1 1      | 1 1 1      | 2 2 2      | 1 1 1    | 2 2 2      | 7  |
| TPIS        | Triosephosphate isomerase                                                                        | TPI1       | 1 1 1      |            |            | 3 6 6    |            | 7  |
| APOF        | Apolipoprotein F                                                                                 | APOF       |            |            | 1 1 1      | 2 3 3    | 1 2 2      | 6  |
| CFAD        | Complement factor D                                                                              | CFD        |            |            | 2 2 2      | 1 1 1    | 2 3 3      | 6  |
| COFA1       | Collagen alpha-1(XV) chain                                                                       | COL15A 1   |            |            |            | 4 6 6    |            | 6  |
| FA9         | Coagulation factor IX                                                                            | F9         | 2 2 2      | 1 1 1      |            | 2 2 2    | 1 1 1      | 6  |
| IGD         | Immunoglobulin delta heavy chain                                                                 |            |            |            |            | 4 4 4    | 2 2 2      | 6  |
| IL11        | Interleukin-11                                                                                   | IL11       | 2 2 2      |            | 2 2 2      | 1 1 1    | 1 1 1      | 6  |
| LTBP1       | Latent-transforming growth factor beta-binding protein 1                                         | LTBP1      |            |            |            | 4 5 5    | 1 1 1      | 6  |



|                |                                                                       |               |   |    |    |   |   |    |   |    |    |   |    |    |    |    |    |    |    |   |   |
|----------------|-----------------------------------------------------------------------|---------------|---|----|----|---|---|----|---|----|----|---|----|----|----|----|----|----|----|---|---|
| MATN2          | Matrilin-2                                                            | MATN2         | 1 | 1  | 1  |   |   |    | 3 | 4  | 4  | 1 | 1  | 1  | 6  |    |    |    |    |   |   |
| PAI1           | Plasminogen activator inhibitor 1                                     | SERPINE1      |   |    |    |   |   |    | 3 | 3  | 3  | 3 | 3  | 3  | 6  |    |    |    |    |   |   |
| PLOD1          | Procollagen-lysine,2-oxoglutarate 5-dioxygenase 1                     | PLOD1         |   |    |    |   |   |    | 5 | 6  | 6  |   |    |    | 6  |    |    |    |    |   |   |
| PRDX1          | Peroxiredoxin-1                                                       | PRDX1         | 1 | 1  | 1  |   | 1 | 1  | 1 | 3  | 3  | 3 | 1  | 1  | 1  | 6  |    |    |    |   |   |
| Q9UL78         | Myosin-reactive immunoglobulin light chain variable region (Fragment) |               | 2 | 2  | 1  | 3 | 3 | 1  | 3 | 3  | 1  | 2 | 3  | 2  | 2  | 2  | 1  | 6  |    |   |   |
| RET4           | Retinol-binding protein 4                                             | RBP4          | 1 | 1  | 1  |   |   |    | 2 | 2  | 2  |   |    |    | 2  | 3  | 3  | 6  |    |   |   |
| TBA1A          | Tubulin alpha-1A chain                                                | TUBA1A        | 1 | 1  | 1  | 1 | 1 | 1  |   |    |    | 3 | 3  | 3  | 1  | 1  | 1  | 6  |    |   |   |
| TSG6           | Tumor necrosis factor-inducible gene 6 protein                        | TNFAIP6       | 1 | 1  | 1  |   |   |    |   |    |    | 3 | 3  | 3  | 2  | 2  | 2  | 6  |    |   |   |
| TSP4           | Thrombospondin-4                                                      | THBS4         | 2 | 2  |    | 3 | 3 |    | 1 | 3  |    | 8 | 9  | 5  | 3  | 3  | 1  | 6  |    |   |   |
| VDAC1          | Voltage-dependent anion-selective channel protein 1                   | VDAC1         |   |    |    |   |   |    | 1 | 1  | 1  | 1 | 1  | 1  | 4  | 4  | 4  | 6  |    |   |   |
| 5NTD           | 5'-nucleotidase                                                       | NT5E          |   |    |    |   |   |    |   |    |    | 5 | 5  | 5  |    |    |    | 5  |    |   |   |
| A0A1B1C<br>YC8 | Vitamin D binding protein (Fragment)                                  | Gc            | 1 | 1  | 1  | 1 | 2 | 2  | 1 | 1  | 1  | 1 | 1  | 1  |    |    |    | 5  |    |   |   |
| ACTN4          | Alpha-actinin-4                                                       | ACTN4         | 1 | 1  |    |   |   |    |   |    |    | 1 | 11 | 5  |    |    |    | 5  |    |   |   |
| ANG1           | Angiogenin                                                            | ANG           |   |    |    |   |   |    | 1 | 1  | 1  | 2 | 2  | 2  | 2  | 2  | 2  | 5  |    |   |   |
| C1R            | Complement C1r subcomponent                                           | C1R           |   |    |    |   |   |    |   |    |    | 5 | 5  | 5  |    |    |    | 5  |    |   |   |
| CADH1          | Cadherin-1                                                            | CDH1          | 1 | 1  | 1  |   |   |    |   |    |    | 3 | 3  | 3  | 1  | 1  | 1  | 5  |    |   |   |
| CAMP           | Cathelicidin antimicrobial peptide                                    | CAMP          | 1 | 1  | 1  |   |   |    | 1 | 1  | 1  | 1 | 1  | 1  | 1  | 2  | 2  | 5  |    |   |   |
| CD109          | CD109 antigen                                                         | CD109         |   |    |    |   |   |    |   |    |    | 5 | 5  | 5  |    |    |    | 5  |    |   |   |
| DAF            | Complement decay-accelerating factor                                  | CD55          |   |    |    | 1 | 1 | 1  |   |    |    | 2 | 2  | 2  | 2  | 2  | 2  | 5  |    |   |   |
| DKK3           | Dickkopf-related protein 3                                            | DKK3          |   |    |    |   |   |    | 1 | 1  | 1  | 1 | 1  | 1  | 3  | 3  | 3  | 5  |    |   |   |
| EF1A1          | Elongation factor 1-alpha 1                                           | EEF1A1        | 1 | 1  | 1  |   |   |    |   |    |    | 3 | 3  | 3  | 1  | 1  | 1  | 5  |    |   |   |
| H4             | Histone H4                                                            | HIST1H4A      | 1 | 1  | 1  |   |   |    | 1 | 1  | 1  | 2 | 2  | 2  | 1  | 1  | 1  | 5  |    |   |   |
| HV349          | Immunoglobulin heavy variable 3-49                                    | IGHV3-49      | 1 | 1  | 1  | 1 | 1 | 1  |   |    |    | 2 | 3  | 3  |    |    |    | 5  |    |   |   |
| IGHG4          | Immunoglobulin heavy constant gamma 4                                 | IGHG4         | 6 | 11 |    | 5 | 6 |    | 9 | 16 | 3  | 8 | 14 | 2  | 6  | 12 |    | 5  |    |   |   |
| ITB1           | Integrin beta-1                                                       | ITGB1         |   |    |    |   |   |    |   |    |    | 5 | 5  | 5  |    |    |    | 5  |    |   |   |
| LTBP2          | Latent-transforming growth factor beta-binding protein 2              | LTBP2         |   |    |    |   |   |    |   |    |    | 4 | 5  | 5  |    |    |    | 5  |    |   |   |
| SAP            | Prosaposin                                                            | PSAP          |   |    |    |   |   |    |   |    |    | 2 | 3  | 3  | 1  | 2  | 2  | 5  |    |   |   |
| THY1           | Thy-1 membrane glycoprotein                                           | THY1          |   |    |    | 2 | 2 | 2  | 1 | 1  | 1  |   |    |    | 2  | 2  | 2  | 5  |    |   |   |
| TIMP1          | Metalloproteinase inhibitor 1                                         | TIMP1         | 1 | 1  | 1  | 1 | 1 | 1  | 1 | 1  | 1  | 1 | 1  | 1  | 1  | 1  | 1  | 5  |    |   |   |
| TIMP3          | Metalloproteinase inhibitor 3                                         | TIMP3         |   |    |    |   |   |    |   |    |    | 5 | 5  | 5  |    |    |    | 5  |    |   |   |
| TM198          | Transmembrane protein 198                                             | TMEM198       | 1 | 1  | 1  | 1 | 1 | 1  | 2 | 2  | 2  |   |    |    | 1  | 1  | 1  | 5  |    |   |   |
| A0A120H<br>G46 | GCT-A10 heavy chain variable region (Fragment)                        |               | 2 | 2  | 2  | 1 | 1 | 1  | 1 | 1  | 1  |   |    |    | 1  | 1  |    | 4  |    |   |   |
| A0A2P9A<br>AK1 | ATP-dependent DNA ligase                                              | BQ8482_110076 | 1 | 1  | 1  |   |   |    |   |    |    | 1 | 1  | 1  | 1  | 2  | 2  | 4  |    |   |   |
| ACTG           | Actin, cytoplasmic 2                                                  | ACTG1         | 5 | 5  |    | 3 | 3 |    | 4 | 4  |    | 1 | 3  | 20 | 4  | 7  | 10 | 4  |    |   |   |
| ADT1           | ADP/ATP translocase 1                                                 | SLC25A4       |   |    |    |   |   |    |   |    |    |   |    |    | 2  | 4  | 4  | 4  |    |   |   |
| C1QC           | Complement C1q subcomponent subunit C                                 | C1QC          |   |    |    |   |   |    |   |    |    | 1 | 2  | 2  | 2  | 2  | 2  | 4  |    |   |   |
| CATD           | Cathepsin D                                                           | CTSD          |   |    |    |   |   |    |   |    |    | 4 | 4  | 4  |    |    |    | 4  |    |   |   |
| CFAH           | Complement factor H                                                   | CFH           | 2 | 9  | 34 | 2 | 9 | 35 | 3 | 6  | 46 | 2 | 3  | 0  | 34 | 3  | 6  | 48 | 2  | 4 |   |
| CO6            | Complement component C6                                               | C6            | 9 | 10 |    | 6 | 6 |    | 1 | 3  | 15 | 1 | 1  | 0  | 14 | 2  | 1  | 0  | 12 | 1 | 4 |
| COCA1          | Collagen alpha-1(XII) chain                                           | COL12A1       |   |    |    |   |   |    |   |    |    | 1 | 1  | 1  | 3  | 3  | 3  |    |    |   | 4 |
| COEA1          | Collagen alpha-1(XIV) chain                                           | COL14A1       |   |    |    |   |   |    |   |    |    | 3 | 4  | 4  |    |    |    |    |    |   | 4 |
| COIA1          | Collagen alpha-1(XVIII) chain                                         | COL18A1       | 1 | 1  | 1  |   |   |    | 1 | 1  | 1  | 1 | 1  | 1  | 1  | 1  | 1  |    |    |   | 4 |
| CRP            | C-reactive protein                                                    | CRP           | 1 | 1  | 1  |   |   |    | 1 | 1  | 1  | 2 | 2  | 2  |    |    |    |    |    |   | 4 |
| FSTL1          | Follistatin-related protein 1                                         | FSTL1         |   |    |    | 1 | 1 | 1  | 1 | 1  | 1  | 1 | 1  | 1  | 1  | 1  | 1  |    |    |   | 4 |
| GDIR1          | Rho GDP-dissociation inhibitor 1                                      | ARHGDI1A      | 1 | 1  | 1  |   |   |    | 1 | 1  | 1  | 1 | 1  | 1  | 1  | 1  | 1  |    |    |   | 4 |
| GSTP1          | Glutathione S-transferase P                                           | GSTP1         | 1 | 1  | 1  |   |   |    |   |    |    | 2 | 2  | 2  | 1  | 1  | 1  |    |    |   | 4 |
| GTR1           | Solute carrier family 2, facilitated glucose transporter              | SLC2A1        | 1 | 1  | 1  |   |   |    |   |    |    | 1 | 1  | 1  | 2  | 2  | 2  |    |    |   | 4 |

|                |                                                                                         |              |        |        |        |             |             |   |  |
|----------------|-----------------------------------------------------------------------------------------|--------------|--------|--------|--------|-------------|-------------|---|--|
|                | member 1                                                                                |              |        |        |        |             |             |   |  |
| HBD            | Hemoglobin subunit delta                                                                | HBD          | 2 3    |        | 1 1    | 1 1         | 7 10 4      | 4 |  |
| HPTR           | Haptoglobin-related protein                                                             | HPR          | 2 2    | 1 1    | 4 4    | 3 3 2       | 3 4 2       | 4 |  |
| IGHM           | Immunoglobulin heavy constant mu                                                        | IGHM         | 1 1 1  | 1 1 1  | 3 3 1  | 5 5 1       |             | 4 |  |
| LEG1           | Galectin-1                                                                              | LGALS1       |        |        |        | 4 4 4       |             | 4 |  |
| SPON1          | Spondin-1                                                                               | SPON1        |        |        |        | 3 3 3       | 1 1 1       | 4 |  |
| UGDH           | UDP-glucose 6-dehydrogenase                                                             | UGDH         |        |        |        | 4 4 4       |             | 4 |  |
| 1433G          | 14-3-3 protein gamma                                                                    | YWHAG        | 1 1    |        |        | 4 5 3       |             | 3 |  |
| A0A024R<br>C55 | Milk fat globule-EGF factor 8 protein, isoform CRA_a                                    | MFGE8        | 5 6    | 4 5    | 5 5    | 1<br>5 21 3 | 7 10        | 3 |  |
| A0A024R<br>DT5 | Periostin, osteoblast specific factor, isoform CRA_a                                    | POSTN        | 8 8    |        |        | 2<br>3 32 2 | 1<br>0 14 1 | 3 |  |
| A0A193C<br>HRO | 10E8 heavy chain variable region (Fragment)                                             |              | 1 1    | 1 1    | 1 1    | 3 3 1       | 4 4 2       | 3 |  |
| A0A2U8J<br>8J2 | Ig heavy chain variable region (Fragment)                                               | IgH          | 1 1 1  |        | 1 1 1  | 1 1 1       | 1 1         | 3 |  |
| A1AG1          | Alpha-1-acid glycoprotein 1                                                             | ORM1         |        |        | 1 1 1  | 2 2 2       |             | 3 |  |
| A1BG           | Alpha-1B-glycoprotein                                                                   | A1BG         |        |        |        | 2 3 3       |             | 3 |  |
| A2J1M8         | Rheumatoid factor RF-IP12 (Fragment)                                                    |              | 1 1 1  |        |        | 1 1 1       | 1 1 1       | 3 |  |
| AFAM           | Afamin                                                                                  | AFM          |        |        | 2 2 2  |             | 1 1 1       | 3 |  |
| ANXA4          | Annexin A4                                                                              | ANXA4        |        |        |        | 3 3 3       |             | 3 |  |
| APOM           | Apolipoprotein M                                                                        | APOM         | 4 4 2  | 1 1    | 2 2    | 4 7         | 3 4 1       | 3 |  |
| ASPN           | Asporin                                                                                 | ASPN         |        |        |        | 3 3 3       |             | 3 |  |
| ATPA           | ATP synthase subunit alpha, mitochondrial                                               | ATP5F1<br>A  |        |        |        | 1 1 1       | 2 2 2       | 3 |  |
| BASI           | Basigin                                                                                 | BSG          |        |        |        | 3 3 3       |             | 3 |  |
| CALM1          | Calmodulin-1                                                                            | CALM1        |        | 1 1 1  | 1 2 2  |             |             | 3 |  |
| CD5L           | CD5 antigen-like                                                                        | CD5L         |        |        | 2 2 2  | 1 1 1       |             | 3 |  |
| CD81           | CD81 antigen                                                                            | CD81         |        |        |        | 3 3 3       |             | 3 |  |
| CFAI           | Complement factor I                                                                     | CFI          |        |        |        | 1 1 1       | 1 2 2       | 3 |  |
| CH3L2          | Chitinase-3-like protein 2                                                              | CHI3L2       |        |        |        | 3 3 3       |             | 3 |  |
| CXL13          | C-X-C motif chemokine 13                                                                | CXCL13       |        |        |        | 2 3 3       |             | 3 |  |
| DSG1           | Desmoglein-1                                                                            | DSG1         |        | 2 2 2  | 1 1 1  |             |             | 3 |  |
| FBLN3          | EGF-containing fibulin-like extracellular matrix protein 1                              | EFEMP1       |        |        |        | 2 2 2       | 1 1 1       | 3 |  |
| HV374          | Immunoglobulin heavy variable 3-74                                                      | IGHV3-<br>74 | 2 2 1  | 1 1    | 1 1    | 3 3 1       | 3 3 1       | 3 |  |
| IBP3           | Insulin-like growth factor-binding protein 3                                            | IGFBP3       |        |        |        | 1 2 2       | 1 1 1       | 3 |  |
| IQGA1          | Ras GTPase-activating-like protein IQGAP1                                               | IQGAP1       |        |        |        | 3 3 3       |             | 3 |  |
| ITA5           | Integrin alpha-5                                                                        | ITGA5        |        |        |        | 3 3 3       |             | 3 |  |
| ITAV           | Integrin alpha-V                                                                        | ITGAV        |        |        |        | 2 3 3       |             | 3 |  |
| KAD1           | Adenylate kinase isoenzyme 1                                                            | AK1          |        |        |        | 2 3 3       |             | 3 |  |
| OAF            | Out at first protein homolog                                                            | OAF          | 1 1 1  |        |        | 1 1 1       | 1 1 1       | 3 |  |
| PLAK           | Junction plakoglobin                                                                    | JUP          |        |        |        |             | 3 3 3       | 3 |  |
| PPIC           | Peptidyl-prolyl cis-trans isomerase C                                                   | PPIC         |        |        |        | 1 2 2       | 1 1 1       | 3 |  |
| Q59EG0         | Basement membrane-specific heparan sulfate proteoglycan core protein variant (Fragment) |              | 6 7 1  | 1 1    | 7 10 1 | 7 7         | 7 12 1      | 3 |  |
| Q9UL83         | Myosin-reactive immunoglobulin light chain variable region (Fragment)                   |              |        | 3 4 1  | 1 2 2  | 1 1         | 1 2         | 3 |  |
| RL40           | Ubiquitin-60S ribosomal protein L40                                                     | UBA52        |        | 1 2 2  |        |             | 1 1 1       | 3 |  |
| S10A7          | Protein S100-A7                                                                         | S100A7       |        |        |        |             | 2 3 3       | 3 |  |
| S29A1          | Equilibrative nucleoside transporter 1                                                  | SLC29A<br>1  |        |        |        | 3 3 3       |             | 3 |  |
| S6BGE0         | IgG H chain                                                                             |              | 8 16 1 | 6 12 1 | 6 16   | 6 19        | 8 19 1      | 3 |  |
| SRPX2          | Sushi repeat-containing protein SRPX2                                                   | SRPX2        | 1 1 1  |        |        | 2 2 2       |             | 3 |  |
| TRY1           | Trypsin-1                                                                               | PRSS1        |        | 1 1 1  |        | 1 1 1       | 1 1 1       | 3 |  |
| TRY3           | Trypsin-3                                                                               | PRSS3        | 1 1 1  | 1 1 1  | 1 1 1  |             |             | 3 |  |
| A0A0X9U<br>WK7 | MS-D4 heavy chain variable region (Fragment)                                            |              |        |        |        | 2 2 1       | 1 1 1       | 2 |  |
| A0A0X9V<br>9B3 | MS-F1 light chain variable region (Fragment)                                            |              |        |        | 1 1 1  | 1 1 1       |             | 2 |  |
| A0A1L2B<br>U40 | Anti-staphylococcal enterotoxin E variable region lambda chain (Fragment)               |              |        |        |        |             | 1 2 2       | 2 |  |
| A0A2P9A        | 3-hydroxyisobutyrate dehydrogenase                                                      | BQ8482       |        |        |        | 1 1 1       | 1 1 1       | 2 |  |

|            |                                                                                        |           |          |          |        |          |          |       |   |
|------------|----------------------------------------------------------------------------------------|-----------|----------|----------|--------|----------|----------|-------|---|
| XT4        |                                                                                        | _90344    |          |          |        |          |          |       |   |
| A0A2R8Y4P5 | Required for meiotic nuclear division protein 1 homolog (Fragment)                     | RMND1     |          |          |        |          |          | 1 2 2 | 2 |
| A0A2U8J8Q6 | Ig heavy chain variable region (Fragment)                                              | IgH       |          | 1 1 1    |        |          | 1 1 1    |       | 2 |
| A0A2U8J8T1 | Ig heavy chain variable region (Fragment)                                              | IgH       | 1 1 1    |          |        |          | 2 2 1    | 1 1   | 2 |
| A0A2U8J936 | Ig heavy chain variable region (Fragment)                                              | IgH       |          |          |        |          | 1 1 1    | 1 1 1 | 2 |
| A2NB45     | Cold agglutinin FS-1 L-chain (Fragment)                                                |           |          |          |        | 2 2 2    |          |       | 2 |
| A8K5T0     | cDNA FLJ75416, highly similar to Homo sapiens complement factor H (CFH), mRNA          |           | 2 9 34   | 3 1 37 2 | 3 5 44 | 3 0 34   | 3 4 46   |       | 2 |
| A8K8Z4     | cDNA FLJ78071, highly similar to Human MHC class III complement component C6 mRNA      |           | 1 0 11 1 | 6 6      | 1 2 14 | 9 12     | 1 0 12 1 |       | 2 |
| AAAT       | Neutral amino acid transporter B(0)                                                    | SLC1A5    |          |          |        |          | 1 2 2    |       | 2 |
| ACTB       | Actin, cytoplasmic 1                                                                   | ACTB      | 5 5      | 3 3      | 4 4    | 1 2 17 1 | 8 11 1   |       | 2 |
| ACTN1      | Alpha-actinin-1                                                                        | ACTN1     | 1 1      |          |        |          | 8 8 2    |       | 2 |
| ANGL2      | Angiopoietin-related protein 2                                                         | ANGPTL2   |          |          |        |          | 2 2 2    |       | 2 |
| ANXA6      | Annexin A6                                                                             | ANXA6     |          |          |        |          | 2 2 2    |       | 2 |
| AQP1       | Aquaporin-1                                                                            | AQP1      |          |          |        |          | 2 2 2    |       | 2 |
| ARF1       | ADP-ribosylation factor 1                                                              | ARF1      |          |          |        |          | 2 2 1    | 1 1 1 | 2 |
| B2MG       | Beta-2-microglobulin                                                                   | B2M       |          |          |        | 1 2 2    |          |       | 2 |
| B2R8I2     | cDNA, FLJ93914, highly similar to Homo sapiens histidine-rich glycoprotein (HRG), mRNA |           | 1 0 20 1 | 6 6 1    | 8 15   | 1 3 22   | 1 1 21   |       | 2 |
| B4DJ26     | Phosphoribosylformylglycinamide synthase (FGAR amidotransferase), isoform CRA_c        | PFAS      |          | 1 2 2    |        |          |          |       | 2 |
| C1QB       | Complement C1q subcomponent subunit B                                                  | C1QB      | 1 1 1    | 1 1 1    |        |          |          |       | 2 |
| C4BPA      | C4b-binding protein alpha chain                                                        | C4BPA     |          |          |        |          | 2 2 2    |       | 2 |
| CD9        | CD9 antigen                                                                            | CD9       |          |          |        |          | 2 2 2    |       | 2 |
| CLC11      | C-type lectin domain family 11 member A                                                | CLEC11A   |          |          |        |          | 2 2 2    |       | 2 |
| CLIC1      | Chloride intracellular channel protein 1                                               | CLIC1     |          |          |        |          | 2 2 2    |       | 2 |
| CLIC4      | Chloride intracellular channel protein 4                                               | CLIC4     |          |          |        |          | 2 2 2    |       | 2 |
| CNTRL      | Centriolin                                                                             | CNTRL     |          |          |        |          | 1 1 1    | 1 1 1 | 2 |
| COF1       | Cofilin-1                                                                              | CFL1      | 1 1 1    |          |        |          |          | 1 1 1 | 2 |
| CSPG4      | Chondroitin sulfate proteoglycan 4                                                     | CSPG4     |          |          |        |          | 2 2 2    |       | 2 |
| CYC        | Cytochrome c                                                                           | CYCS      | 1 1 1    |          | 1 1 1  |          |          |       | 2 |
| CYTC       | Cystatin-C                                                                             | CST3      | 1 1 1    |          | 1 1 1  |          |          |       | 2 |
| EF2        | Elongation factor 2                                                                    | EEF2      |          |          |        |          | 2 2 2    |       | 2 |
| FA10       | Coagulation factor X                                                                   | F10       | 1 1 1    | 1 1 1    |        |          |          |       | 2 |
| FABPH      | Fatty acid-binding protein, heart                                                      | FABP3     |          |          |        |          | 1 1 1    | 1 1 1 | 2 |
| FBN1       | Fibrillin-1                                                                            | FBN1      |          |          |        |          | 1 1 1    | 1 1 1 | 2 |
| FHR3       | Complement factor H-related protein 3                                                  | CFHR3     | 2 2      | 1 1      | 1 1    | 1 1 1    | 1 1 1    | 3 3 1 | 2 |
| FILA2      | Filaggrin-2                                                                            | FLG2      |          |          |        |          |          | 1 2 2 | 2 |
| GDIB       | Rab GDP dissociation inhibitor beta                                                    | GDI2      |          |          |        |          | 2 2 2    |       | 2 |
| H2B1B      | Histone H2B type 1-B                                                                   | HIST1H2BB |          | 1 1 1    |        |          | 1 1 1    |       | 2 |
| HRG        | Histidine-rich glycoprotein                                                            | HRG       | 1 0 20 1 | 5 5      | 8 15   | 1 4 23 1 | 1 1 21   |       | 2 |
| HSPB1      | Heat shock protein beta-1                                                              | HSPB1     |          |          |        |          | 1 1 1    | 1 1 1 | 2 |
| IGF2       | Insulin-like growth factor II                                                          | IGF2      |          |          |        |          | 2 2 2    |       | 2 |
| ISK5       | Serine protease inhibitor Kazal-type 5                                                 | SPINK5    |          |          |        |          | 1 2 2    |       | 2 |
| KPRP       | Keratinocyte proline-rich protein                                                      | KPRP      |          | 1 1 1    |        |          |          | 1 1 1 | 2 |
| MA1A1      | Mannosyl-oligosaccharide 1,2-alpha-mannosidase IA                                      | MAN1A1    |          |          |        |          | 2 2 2    |       | 2 |
| MAMC2      | MAM domain-containing protein 2                                                        | MAMDC2    |          |          |        |          | 1 2 2    |       | 2 |
| MED30      | Mediator of RNA polymerase II transcription subunit 30                                 | MED30     |          |          |        |          | 1 1 1    | 1 1 1 | 2 |
| MGST3      | Microsomal glutathione S-transferase 3                                                 | MGST3     |          |          |        |          | 1 1 1    | 1 1 1 | 2 |
| MMRN2      | Multimerin-2                                                                           | MMRN2     |          |          |        | 1 1 1    |          | 1 1 1 | 2 |
| MRCKB      | Serine/threonine-protein kinase MRCK beta                                              | CDC42BPB  | 1 1 1    |          |        |          | 1 1 1    |       | 2 |

|        |                                                                          |              |   |    |   |   |    |   |   |    |   |   |    |   |   |    |   |   |
|--------|--------------------------------------------------------------------------|--------------|---|----|---|---|----|---|---|----|---|---|----|---|---|----|---|---|
| NB5R3  | NADH-cytochrome b5 reductase 3                                           | CYB5R3       |   |    |   | 2 | 2  | 2 |   | 2  |   |   |    |   |   |    |   |   |
| NBL1   | Neuroblastoma suppressor of tumorigenicity 1                             | NBL1         |   |    |   | 1 | 2  | 2 |   | 2  |   |   |    |   |   |    |   |   |
| NEUS   | Neuroserpin                                                              | SERPINI<br>1 |   |    |   |   |    |   | 2 | 2  | 2 |   |    |   |   |    |   |   |
| PA2GA  | Phospholipase A2, membrane associated                                    | PLA2G2<br>A  | 1 | 1  | 1 |   |    |   | 1 | 1  | 1 | 2 |    |   |   |    |   |   |
| PGCA   | Aggrecan core protein                                                    | ACAN         |   |    |   |   |    |   | 2 | 2  | 2 | 2 |    |   |   |    |   |   |
| PLOD2  | Procollagen-lysine,2-oxoglutarate 5-dioxygenase 2                        | PLOD2        |   |    |   |   |    |   | 2 | 2  | 2 | 2 |    |   |   |    |   |   |
| PLSL   | Plastin-2                                                                | LCP1         | 1 | 1  | 1 |   |    |   | 3 | 3  | 1 | 2 |    |   |   |    |   |   |
| PLST   | Plastin-3                                                                | PLS3         |   |    |   |   |    |   | 4 | 4  | 2 | 2 |    |   |   |    |   |   |
| PPIB   | Peptidyl-prolyl cis-trans isomerase B                                    | PPIB         | 1 | 1  | 1 |   |    |   | 1 | 1  | 1 | 2 |    |   |   |    |   |   |
| Q6U2L6 | C4B (Fragment)                                                           | C4B          | 1 | 1  | 1 |   |    |   |   |    |   | 2 |    |   |   |    |   |   |
| Q9UL85 | Myosin-reactive immunoglobulin kappa chain variable region (Fragment)    |              |   |    |   | 2 | 3  |   | 2 | 2  | 1 | 2 | 3  | 1 | 2 |    |   |   |
| Q9Y355 | Apolipoprotein A1 (Fragment)                                             |              | 4 | 6  |   | 6 | 10 | 1 | 4 | 7  |   | 6 | 7  | 1 | 4 | 11 | 2 |   |
| QCR2   | Cytochrome b-c1 complex subunit 2, mitochondrial                         | UQCRC<br>2   |   |    |   |   |    |   |   |    |   | 1 | 2  | 2 |   | 2  |   |   |
| S10A8  | Protein S100-A8                                                          | S100A8       |   |    |   |   |    |   |   |    |   | 2 | 2  | 2 |   | 2  |   |   |
| S6BAM6 | IgG H chain                                                              |              | 7 | 15 |   | 5 | 11 |   | 6 | 16 |   | 7 | 20 | 1 | 8 | 19 | 1 | 2 |
| SEM3C  | Semaphorin-3C                                                            | SEMA3<br>C   |   |    |   |   |    |   |   |    |   | 1 | 1  | 1 | 1 | 1  | 1 | 2 |
| SFRP2  | Secreted frizzled-related protein 2                                      | SFRP2        |   |    |   |   |    |   |   |    |   | 2 | 2  | 2 |   |    |   | 2 |
| SIL1   | Nucleotide exchange factor SIL1                                          | SIL1         |   |    |   |   |    |   |   |    |   | 2 | 2  | 2 |   |    |   | 2 |
| SRCRL  | Soluble scavenger receptor cysteine-rich domain-containing protein SSC5D | SSC5D        |   |    |   |   |    |   |   |    |   | 1 | 1  | 1 | 1 | 1  | 1 | 2 |
| SRPX   | Sushi repeat-containing protein SRPX                                     | SRPX         |   |    |   |   |    |   |   |    |   | 2 | 2  | 2 |   |    |   | 2 |
| TAGL2  | Transgelin-2                                                             | TAGLN2       |   |    |   |   |    |   |   |    |   | 2 | 2  | 2 |   |    |   | 2 |
| TBB2A  | Tubulin beta-2A chain                                                    | TUBB2A       |   |    |   |   |    |   |   |    |   | 2 | 2  | 2 |   |    |   | 2 |
| TITIN  | Titin                                                                    | TTN          |   |    |   |   |    |   |   |    |   | 1 | 1  | 1 | 1 | 1  | 1 | 2 |
| TLN1   | Talin-1                                                                  | TLN1         |   |    |   |   |    |   |   |    |   | 2 | 2  | 2 |   |    |   | 2 |
| TM109  | Transmembrane protein 109                                                | TMEM1<br>09  |   |    |   |   |    |   |   |    |   | 1 | 1  | 1 | 1 | 1  | 1 | 2 |
| TUT7   | Terminal uridylyltransferase 7                                           | TUT7         |   |    |   |   |    |   | 1 | 1  | 1 | 1 | 1  | 1 |   |    |   | 2 |
| VAT1   | Synaptic vesicle membrane protein VAT-1 homolog                          | VAT1         |   |    |   |   |    |   |   |    |   | 2 | 2  | 2 |   |    |   | 2 |
| VINC   | Vinculin                                                                 | VCL          |   |    |   |   |    |   |   |    |   | 2 | 2  | 2 |   |    |   | 2 |
| WISP2  | WNT1-inducible-signaling pathway protein 2                               | WISP2        |   |    |   |   |    |   |   |    |   |   |    |   | 2 | 2  | 2 | 2 |
